# Supplementary material for: Distinct p21 requirements for regulating normal and self-reactive T cells through IFN-γ production
Source: Sci Rep. 2015 Jan 9;5:7691. doi: 10.1038/srep07691 (PMC4287747; doi:10.1038/srep07691)

**Distinct p21 requirements for regulating normal and self-reactive T cells through IFN- $\gamma$  production**

Lidia Daszkiewicz, Cristina Vázquez-Mateo, Gorjana Rackov, André Ballesteros-Tato, Kathrin Weber, Adrián Madrigal-Avilés, Mauro Di Pilato, Arun Fotedar, Rati Fotedar, Juana M. Flores, Mariano Esteban, Carlos Martínez-A and Dimitrios Balomenos

**Figure S1. Thymic T cell profile for B6, B6/*lpr*, B6-p21tg and B6/*lpr*-p21tg mice.**

Single-cell suspensions were prepared from 1.5-month-old B6, B6/*lpr*, B6-p21tg and B6/*lpr*-p21tg mouse thymus, and surface CD4 and CD8 expression analyzed by flow cytometry. Representative data are shown from three independent experiments.

**Figure S2. p21 overexpression does not affect IL-2 expression in memory T cells.**

Flow cytometry analysis of intracellular IL-2 in lymph node CD4<sup>+</sup>CD44<sup>hi</sup> T cells from 4-month-old B6/*lpr*, B6/*lpr*-p21tg, B6 and B6-p21tg mice. Data from one representative experiment of two performed, each experiment included  $n = 4$  mice.

**Figure S3. p21 expression in B6 and B6-p21tg T cells.**

Purified T cells from B6 and B6-p21tg mouse spleens were ConA-stimulated and -restimulated after an IL-2 expansion phase. Western blot analysis shows endogenous and transgenic p21 protein levels in both cell types at the end of IL-2 expansion (0 h) and at several points after ConA restimulation.  $\beta$ -actin was used as a loading control. The samples were derived from the same experiment and the two gels were run and processed simultaneously under the same experimental conditions.

**Figure S4. Decreased *in vitro* proliferation of B6/*lpr*-p21tg T cells stimulated with anti-CD3 and -CD28 antibodies.**

(A) Purified spleen T cells from B6/*lpr* and B6/*lpr*-p21tg mice were costimulated with anti-CD3 and -CD28 antibodies (1<sup>st</sup> stimulation), IL-2-expanded, and restimulated with the same antibodies (2<sup>nd</sup> stimulation). Transgenic p21 reduced T cell responses only after secondary stimulation. Proliferation was measured by [<sup>3</sup>H]thymidine incorporation after first or second challenge. Values show mean  $\pm$  SD ( $n = 4$ ). (B) B6/*lpr*-p21tg T cell generation was decreased compared to B6/*lpr* T cells after secondary stimulation, determined by trypan blue exclusion. Values show mean  $\pm$  SD ( $n = 4$ ). (C) Cell cycle analysis at 48 h after

anti-CD3/CD28 2<sup>nd</sup> stimulation showed decreased B6/*lpr*-p21tg T cell proliferation compared to B6/*lpr* T cells. Representative histograms are shown ( $n = 3$ ).

**Figure S5. Decreased double negative (DN) T cell accumulation and lymphadenopathy in MRL/*lpr*-p21tg mice.** (A) Percentage of DN T cells in lymph nodes of 4- to 6-month-old MRL/*lpr* and MRL/*lpr*-p21tg mice. Values are mean  $\pm$  SD ( $n = 10$  mice;  $p = 4.24 \times 10^{-5}$ ). (B) Decreased size and weight of cervical lymph nodes in 4- to 6-month-old female MRL/*lpr*-p21tg vs. MRL/*lpr* and MRL-Mp mice. Values are mean  $\pm$  SD ( $n = 10$  mice;  $p = 1.7 \times 10^{-6}$ ).

**Figure S6. Original gels for figure 7C.** (A) Original gel for kinase assay. (B) Original gel for Western blot.

**Figure S7. Decreased B6/*lpr* macrophage activation by B6/*lpr*-p21tg T cell culture supernatant.** (A) B6/*lpr* peritoneal macrophages were exposed to supernatants from B6/*lpr* and B6/*lpr*-p21tg T cells that were submitted to a secondary ConA stimulation. Western blot analysis showed reduced phospho-STAT1 activation and absence of iNOS induction in macrophages stimulated by supernatants from B6/*lpr*-p21tg T cell cultures (left). Phospho-STAT1 and iNOS expression in B6/*lpr* macrophages stimulated with different IFN- $\gamma$  concentrations (right). (B) IFN- $\gamma$  concentrations in supernatants from T cell cultures after secondary stimulation were lower in B6/*lpr*-p21tg compared to B6/*lpr* supernatants. Values are obtained from T cell pools of three different mice.

**Figure S8. Decreased proliferation of B6/*lpr*-p21tg CD8<sup>+</sup> T cells after secondary stimulation.** (A) Cell cycle analysis after DAPI and CD8 staining showed reduced cell cycle progression of B6/*lpr*-p21tg CD8<sup>+</sup> T cells compared to B6/*lpr* cells, after secondary stimulation of purified CD8<sup>+</sup> T cells. DN T cells showed absence of cell cycle progression in both cases. (B) BrdU analysis of purified CD8<sup>+</sup> T cells 24 h after secondary stimulation. BrdU was added at

the last 3 h of stimulation. Representative plots show gated TCR<sup>+</sup> cells and data indicate higher BrdU incorporation in B6/*lpr* compared to B6/*lpr*-p21tg CD8<sup>+</sup> cells. DN T cells are represented as CD8<sup>-</sup> cells that do not incorporate BrdU. DN cells are generated in similar percentages after secondary stimulation of B6/*lpr* and B6/*lpr*-p21tg CD8<sup>+</sup> cells. Data are obtained from T cell pools of three different mice.

Figure S1

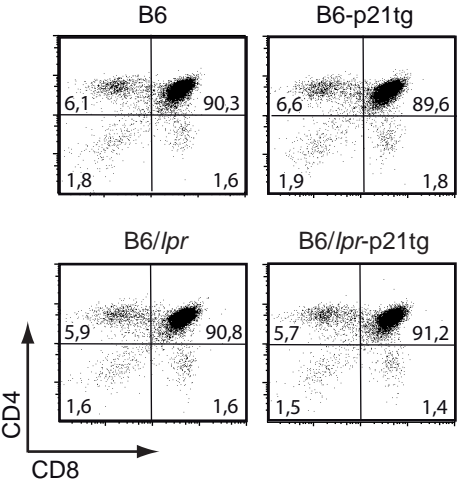

Figure S2

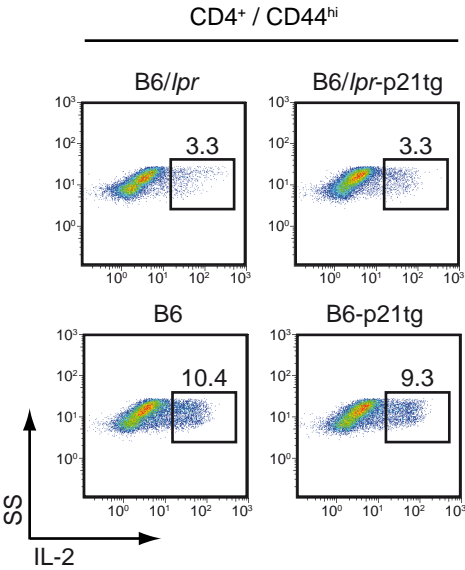

Figure S3

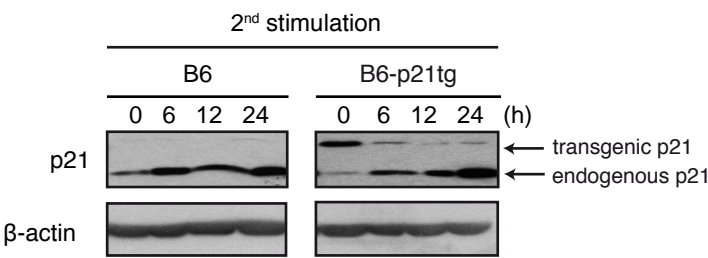

Figure S4

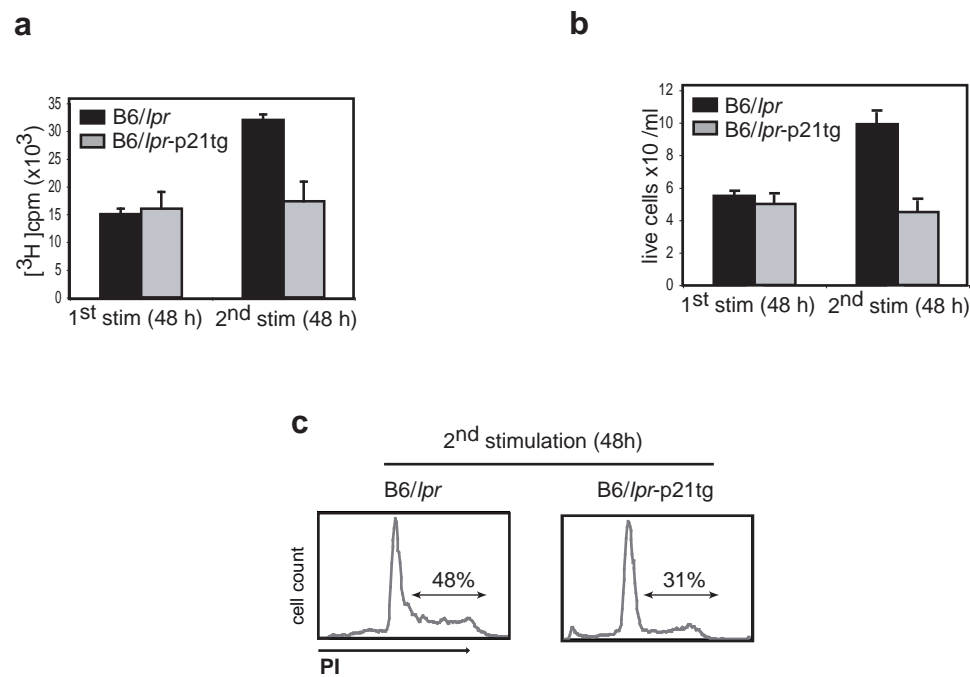

Figure S5

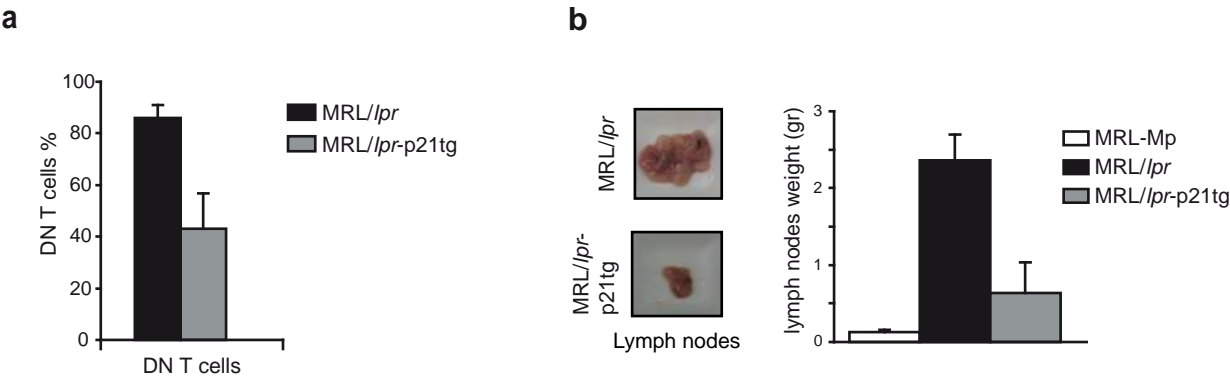

Figure S6

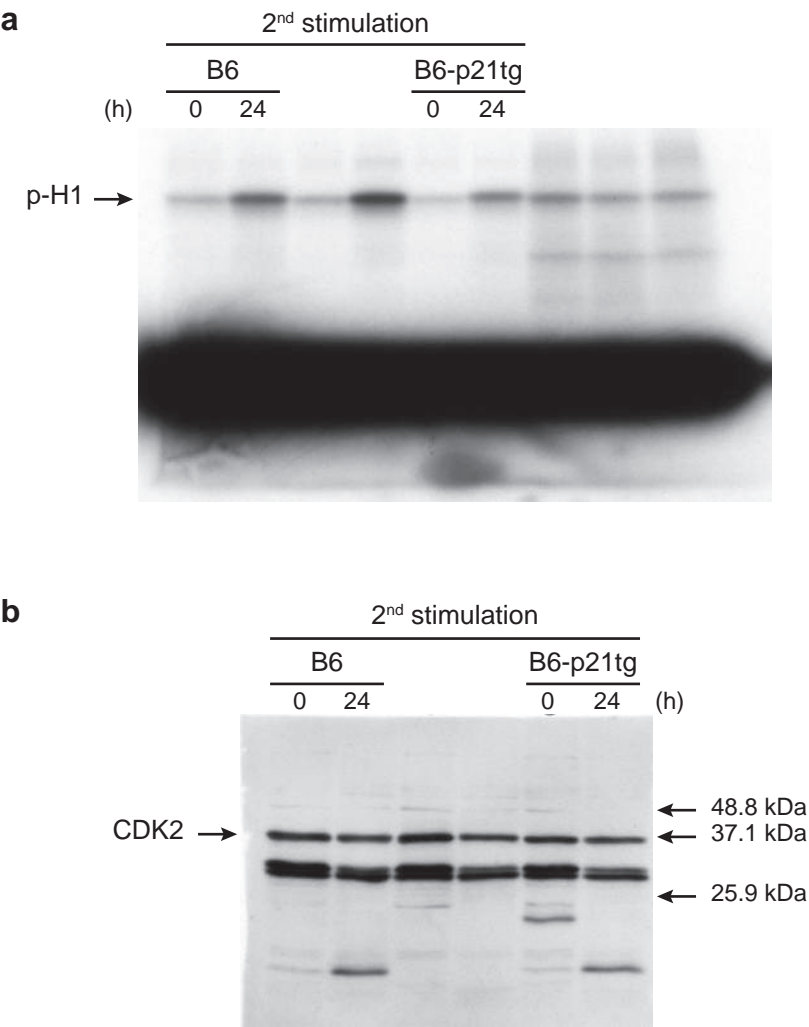

Figure S7

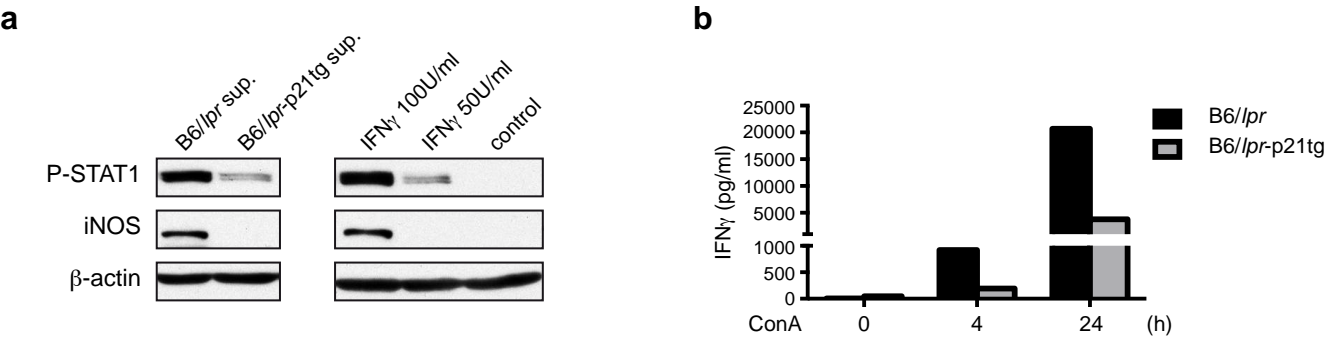

Figure S8

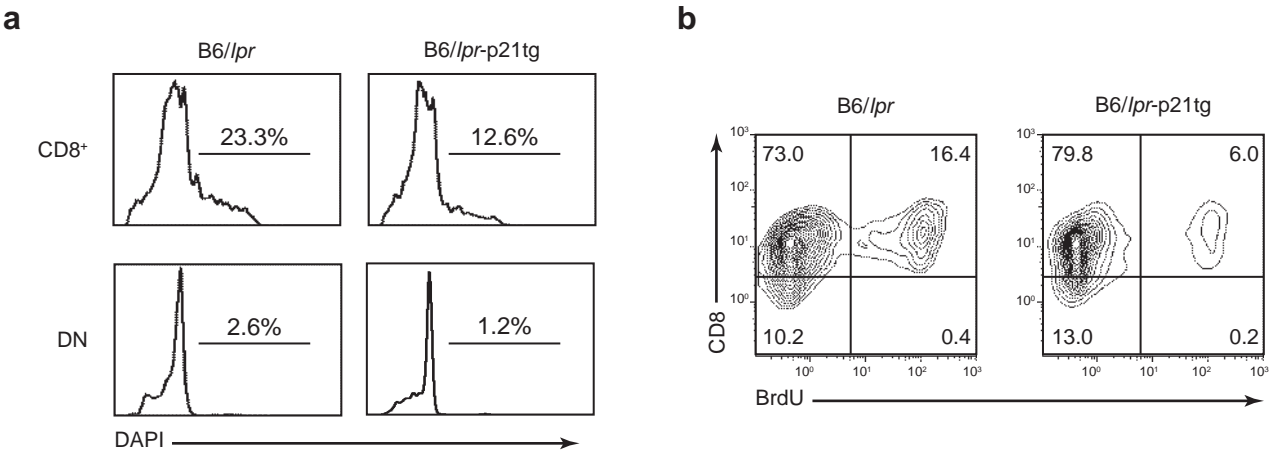

Supplement: Supplementary Information [file srep07691-s1.pdf]
